# Supplementary material for: Skeletal myotubes expressing ALS mutant SOD1 induce pathogenic changes, impair mitochondrial axonal transport, and trigger motoneuron death
Source: PubMed Central journal article supplement (PMC11505737; doi:10.1186/s10020-024-00942-4), 2024-10-25

# Supplemental figure 1

A

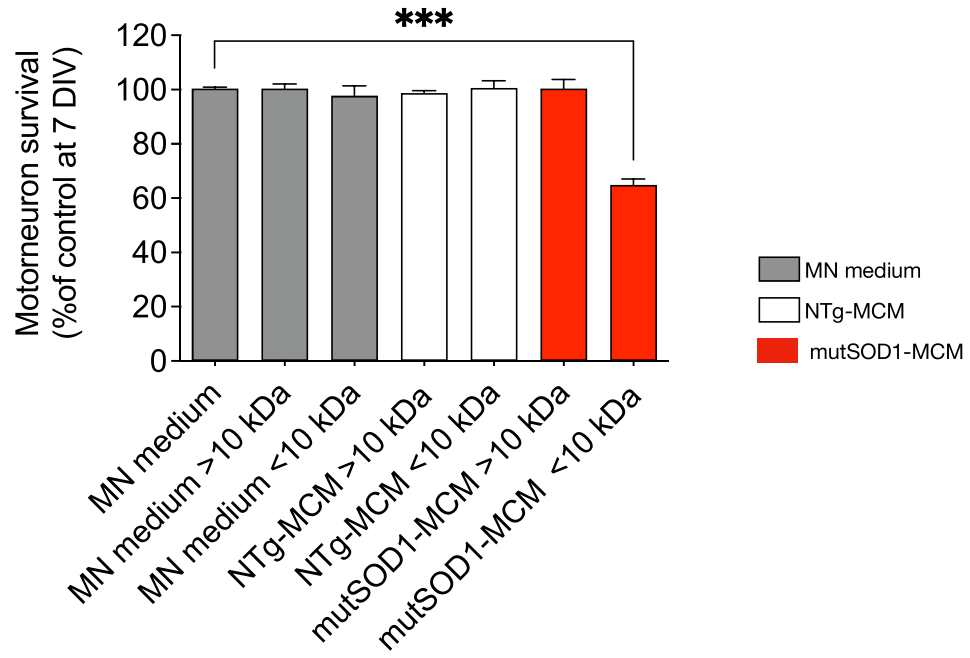

B

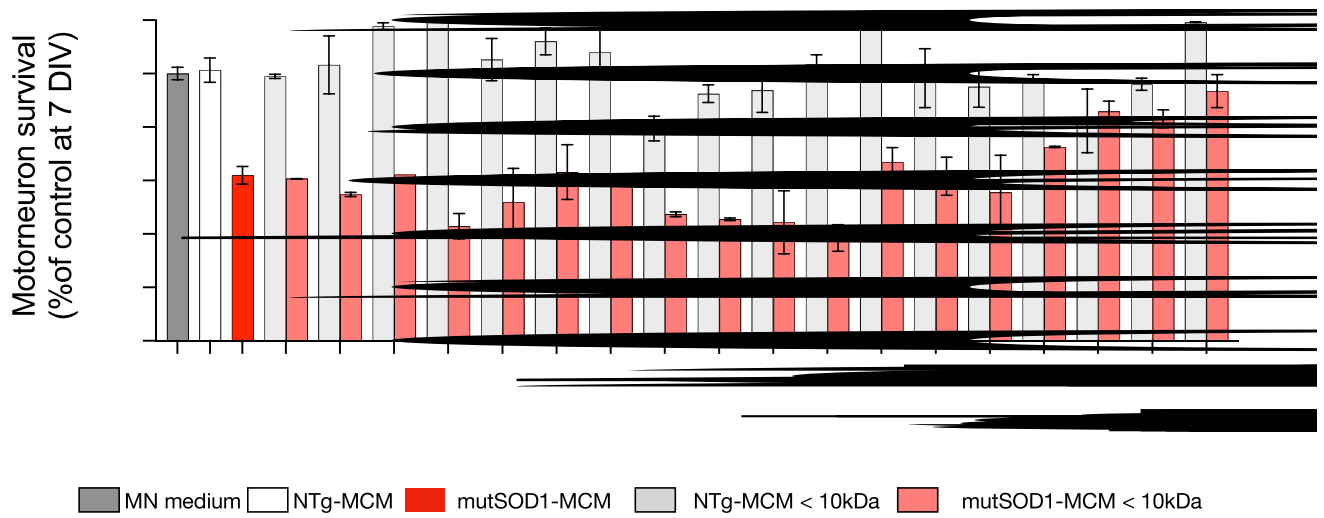

Supplement: 10020_2024_942_MOESM1_ESM.pdf [file 10020_2024_942_MOESM1_ESM.pdf]
